# Supplementary material
Source: PubMed Central journal article supplement (PMC4303016)
Supplement: Supp_Fig1.pdf [file Supp_Fig1.pdf]

## Supplementary Data

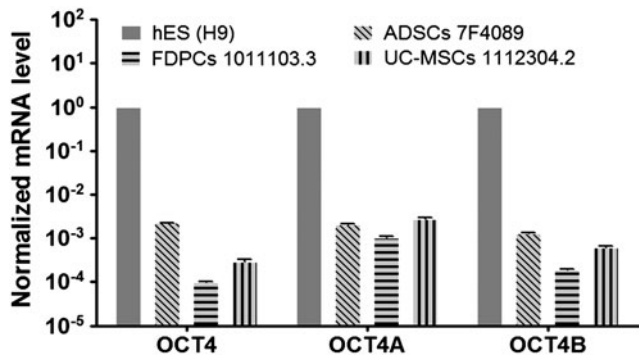

**SUPPLEMENTARY FIG. S1.** Endogenous levels of *OCT4* in human mesenchymal stem cells. Total *OCT4*, *OCT4A*, and *OCT4B* mRNA expression was assessed by quantitative reverse transcription–polymerase chain reaction using TaqMan primers in human embryonic stem cells (H9), adipose-derived stem cells (ADSCs) 7F4089, follicle dermal papilla cells (FDPCs) 1011103.3 and 1112304.2. Expression values were normalized to *GAPDH* levels.  $n=2$ .
