# Supplementary material
Source: PubMed Central journal article supplement (PMC4303016)
Supplement: Supp_Fig2.pdf [file Supp_Fig2.pdf]

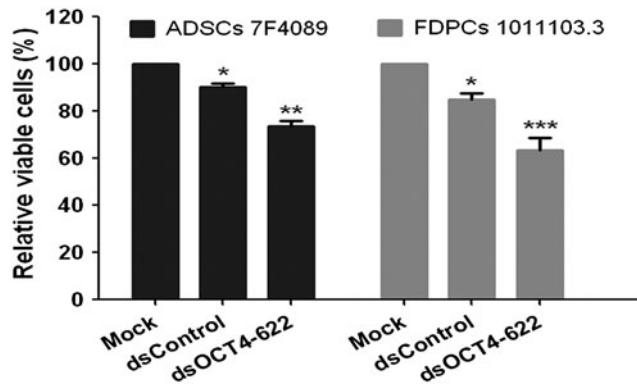

**SUPPLEMENTARY FIG. S2.** RNAa-mediated *OCT4* activation inhibits cell viability of ADSCs and FDPCs. ADSCs 7F4089 and FDPCs 1011103.3 were transfected with the indicated dsRNAs at 50 nM. MTT assay was conducted 96 h following transfection. Results are plotted as the percentage of viable cells relative to mock transfections.  $n=3$ . \* $P<0.05$ ; \*\* $P<0.01$ ; \*\*\* $P<0.001$ .
