# Supplementary material
Source: PubMed Central journal article supplement (PMC4303016)
Supplement: Supp_Table1.pdf [file Supp_Table1.pdf]

SUPPLEMENTARY TABLE S1. SEQUENCES OF dsRNAs

| <i>dsRNA name</i> | <i>Sense sequence (5'-3')</i> | <i>Antisense sequence (5'-3')</i> |
|-------------------|-------------------------------|-----------------------------------|
| dsOCT4-141        | GCCACCACCAUUAAGGCAAA[dT][dT]  | UUUGCCUAAUGGUGGUGGC[dT][dT]       |
| dsOCT4-162        | UCCCCUCCACAGACACCA[dT][dT]    | UGGUGUCUGUGGAAGGGGA[dT][dT]       |
| dsOCT4-257        | AGUGAGACCCUGUCUAAAA[dT][dT]   | UUUAAGACAGGGUCUCACU[dT][dT]       |
| dsOCT4-275        | CUCCAGUCUGGGCAACAAA[dT][dT]   | UUUGUUGCCCAGACUGGAG[dT][dT]       |
| dsOCT4-420        | GGCCCAUCUCUACUAAAA[dT][dT]    | UUUUAGUAGAGAUAGGGGCC[dT][dT]      |
| dsOCT4-422        | AAGGCCCAUCUCUACUAA[dT][dT]    | UUAGUAGAGAUAGGGGCCUU[dT][dT]      |
| dsOCT4-573        | UGGGAUGUGCAGAGCCUGA[dT][dT]   | UCAGGCUCUGCACAUCCCA[dT][dT]       |
| dsOCT4-581        | CAGACAGCUGGGAUGUGCA[dT][dT]   | UGCACAUCCCAGCUGUCUG[dT][dT]       |
| dsOCT4-586        | GAUUCAGACAGCUGGGAU[dT][dT]    | AUCCCAGCUGUCUGGAAUC[dT][dT]       |
| dsOCT4-594        | GUGGGAGUGAUUCCAGACA[dT][dT]   | UGUCUGGAAUCACUCCCAC[dT][dT]       |
| dsOCT4-598        | AGGUGUGGGAGUGAUUCCA[dT][dT]   | UGGAAUCACUCCCACACCU[dT][dT]       |
| dsOCT4-616        | GGUUCUGAAGAACAUGGA[dT][dT]    | UCCAUGUUCUUCAGGAACC[dT][dT]       |
| dsOCT4-620        | CCUGGGUUCUGAAGAACA[dT][dT]    | UGUUCUUCAGGAACCCAGG[dT][dT]       |
| dsOCT4-621        | ACCUGGGUUCUGAAGAAC[dT][dT]    | GUUCUUCAGGAACCCAGGU[dT][dT]       |
| dsOCT4-622        | CACCUGGGUUCUGAAGAA[dT][dT]    | UUCUUCAGGAACCCAGGUG[dT][dT]       |
| dsOCT4-623        | GCACCUGGGUUCUGAAGA[dT][dT]    | UCUUCAGGAACCCAGGUGC[dT][dT]       |
| dsOCT4-625        | AAGCACCUGGGUUCUGAA[dT][dT]    | UUCAGGAACCCAGGUGCUU[dT][dT]       |
| dsOCT4-626        | CAAGCACCUGGGUUCUGA[dT][dT]    | UCAGGAACCCAGGUGCUUG[dT][dT]       |
| dsOCT4-628        | GUCAAGCACCUGGGUUCU[dT][dT]    | AGGAACCCAGGUGCUUGAC[dT][dT]       |
| dsOCT4-631        | GGGUCAAGCACCUGGGUU[dT][dT]    | AACCCAGGUGCUUGACCCC[dT][dT]       |
| dsOCT4-636        | GAGAGGGGUCAAGCACCU[dT][dT]    | AGGUGCUUGACCCCCUCUC[dT][dT]       |
| dsOCT4-639        | GUGGAGAGGGGUCAAGCA[dT][dT]    | UGCUUGACCCCCUCUCCAC[dT][dT]       |
| dsOCT4-642        | UCUGUGGAGAGGGGGUCA[dT][dT]    | UUGACCCCCUCUCCACAGA[dT][dT]       |
| dsOCT4-711        | CCACACACAUUCAUAA[dT][dT]      | UUUUUGAAUGUGUGUGG[dT][dT]         |
| dsOCT4-781        | GGAUCGGGGGAAGGCAUAA[dT][dT]   | UUUUGCCUUCUCCCAUCC[dT][dT]        |
| dsOCT4-893        | CUCUUGAAGAUGGGGUGAA[dT][dT]   | UUCACCCCAUCUUCAAGAG[dT][dT]       |
| dsOCT4-976        | UCUGGAGUCUGAUUCUGGA[dT][dT]   | UCCAGAAUCAGACUCCAGA[dT][dT]       |
| dsControl         | ACUACUGAGUGACAGUAGA[dT][dT]   | UCUACUGUCACUCAGUAGU[dT][dT]       |

Number in dsRNA name denotes target location relative to the transcription start site.
