# Supplementary material
Source: PubMed Central journal article supplement (PMC4303016)
Supplement: Supp_Table2.pdf [file Supp_Table2.pdf]

SUPPLEMENTARY TABLE S2. SEQUENCES  
FOR POLYMERASE CHAIN REACTION PRIMERS

---

| <i>SYBER green<br/>primer</i> | <i>Sequence (5'-3')</i>                                              |
|-------------------------------|----------------------------------------------------------------------|
| <i>OCT4</i>                   | Sense: TCGAGAACCGAGTGAGAGG<br>Antisense: GAACCACACTCGGACC<br>ACA     |
| <i>GAPDH</i>                  | Sense: ATCACCATCTTCCAGGAGCGA<br>Antisense: TTCTCCATGGTGGTGA<br>AGACG |

---

| <i>TaqMan<br/>primer</i> | <i>TaqMan<sup>®</sup> Assay ID</i> |
|--------------------------|------------------------------------|
| <i>OCT4</i>              | Hs00999632_g1                      |
| <i>OCT4A</i>             | Hs01895061_u1                      |
| <i>OCT4B</i>             | Hs00742896_s1                      |
| <i>GAPDH</i>             | Hs99999905-m1                      |

---
